# Supplementary material
Source: publisher site journal article supplement (https://www.dovepress.com/article/560746)
Supplement: Supplementary file 1 [file 560746%20Revised%20%252509Supplementary%20Material.docx]

**Supplementary Material**


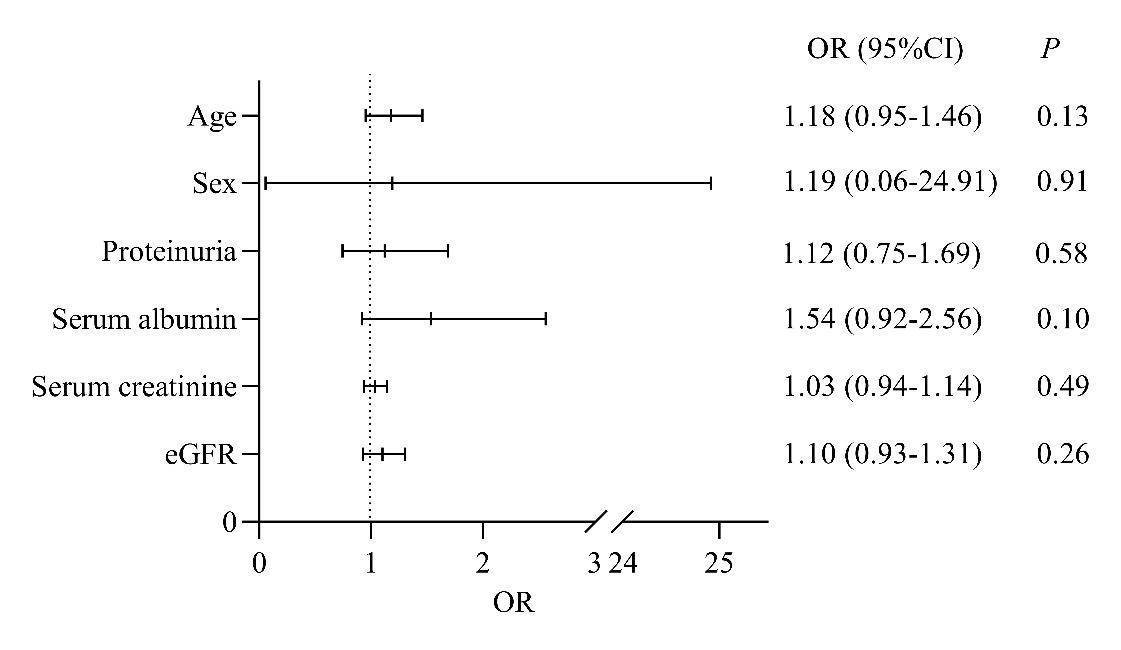


**Figure S1.** Univariate logistic analyses in the rituximab and obinutuzumab groups. Analyses according to age, sex, proteinuria, serum albumin, serum creatinine and eGFR. eGFR, estimated glomerular filtration rate.

Table S1. Changes in clinical indicators at 3-12 months in patients in the rituximab and obinutuzumab groups.

| **Study Time Points** | **Obinutuzumab (N=18)** | **Rituximab (N=21)** | ***P* Value** |
| --- | --- | --- | --- |
| Proteinuria, g/d |  |  |  |
| 3 mo | 3.8 (2.8-5.2) | 3.5 (1.8-4.9) | 0.23 |
| 6 mo | 1.5 (0.4-2.4) | 1.8 (0.3-4.5) | 0.39 |
| 12 mo | 0.3 (0.3-0.7) | 0.6 (0.2-2.3) | 0.09 |
| Serum albumin, g/L |  |  |  |
| 3 mo | 33.4±4.4 | 31.9±6.9 | 0.44 |
| 6 mo | 39.3±3.8 | 25.6±8.5 | 0.11 |
| 12 mo | 40.7±2.9 | 38.5±7.2 | 0.22 |
| Serum creatinine, μmol/L |  |  |  |
| 3 mo | 82.3 (63.1-91.0) | 77.7 (58.8-86.1) | 0.55 |
| 6 mo | 81.2 (68.7-90.5) | 83.1 (56.8-94.6) | 0.93 |
| 12 mo | 84.6 (65.6-90.6) | 82.9 (60.4-91.3) | 1.00 |
| eGFR, ml/min/1.73 m² |  |  |  |
| 3 mo | 96.8±19.8 | 89.7±29.2 | 0.40 |
| 6 mo | 99.0±20.4 | 88.6±29.0 | 0.24 |
| 12 mo | 99.2±24.1 | 89.9±20.8 | 0.27 |

eGFR, estimated glomerular filtration rate; Values are presented as mean ± SD, or median (interquartile range); *P* < 0.05 was statistical difference.
